# Supplementary material for: Pancreatic α- and β-cellular clocks have distinct molecular properties and impact on islet hormone secretion and gene expression
Source: PubMed Central journal article supplement — Genes Dev. 2017 Feb 15;31(4):383–98. doi: 10.1101/gad.290379.116 (PMC5358758; doi:10.1101/gad.290379.116), 2017-02-15
Supplement: supp_gad.290379.116_Supplemental_FigureS2.pdf [file supp_gad.290379.116_Supplemental_FigureS2.pdf]

**A**

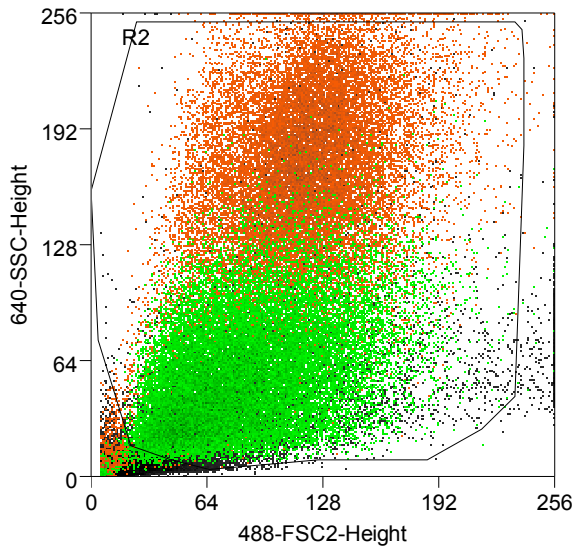

| Region | Count | % Hist | % All |
|--------|-------|--------|-------|
| Total  | 30000 | 100.00 | 6.00  |
| R2     | 17235 | 57.45  | 3.45  |

**B**

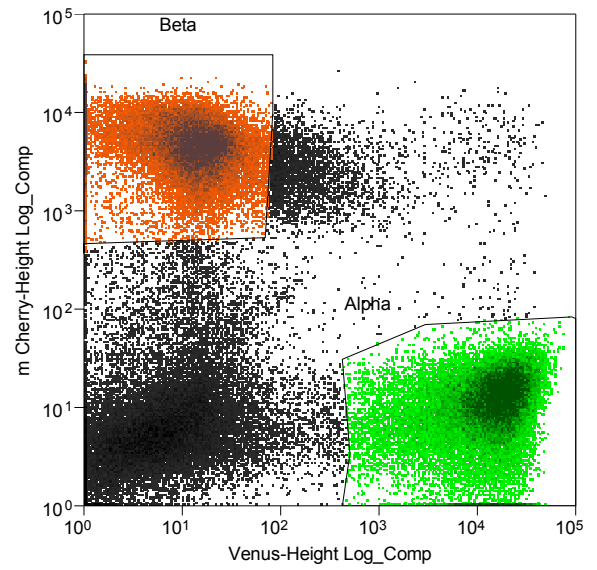

| Region | Count | % Hist | % All |
|--------|-------|--------|-------|
| Total  | 30000 | 100.00 | 6.00  |
| Beta   | 15988 | 53.29  | 3.20  |
| Alpha  | 5350  | 17.83  | 1.07  |

**C**

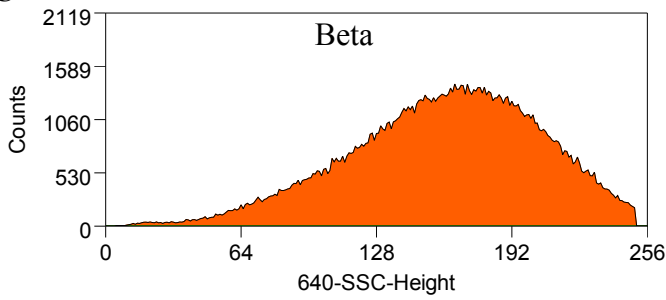

| Region | Count  | % Hist | % All | Median |
|--------|--------|--------|-------|--------|
| Total  | 154556 | 100.00 | 30.91 | 163.00 |

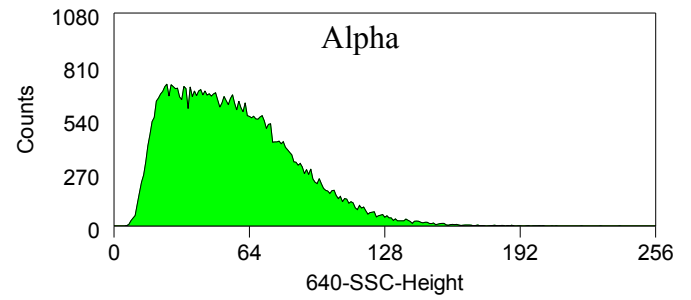

| Region | Count | % Hist | % All | Median |
|--------|-------|--------|-------|--------|
| Total  | 50102 | 100.00 | 10.02 | 52.00  |

**D**

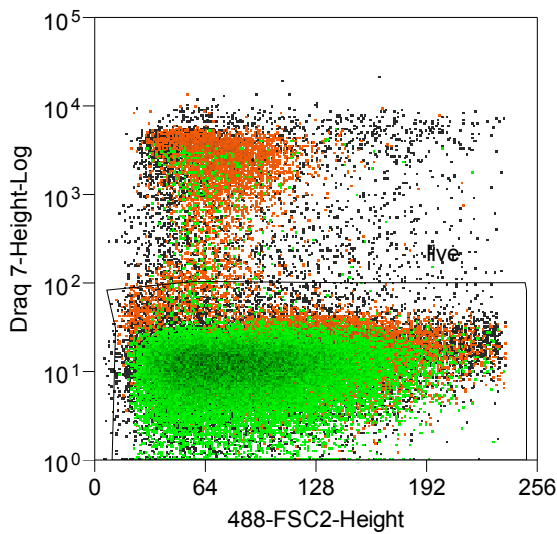

| Region | Count | % Hist |
|--------|-------|--------|
| Total  | 30000 | 100.00 |
| live   | 26431 | 88.10  |

**E**

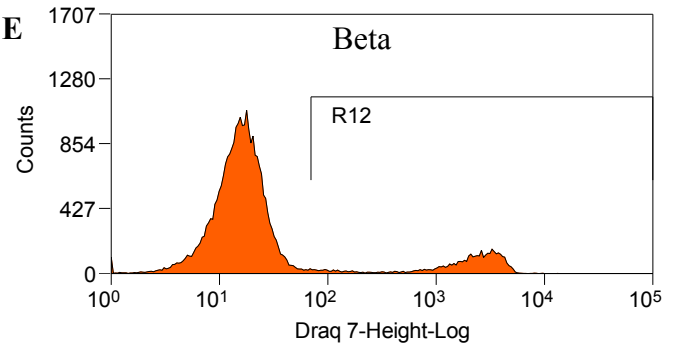

| Region | Count | % Hist | % All |
|--------|-------|--------|-------|
| Total  | 30000 | 100.00 | 6.00  |
| R12    | 4333  | 14.44  | 0.87  |

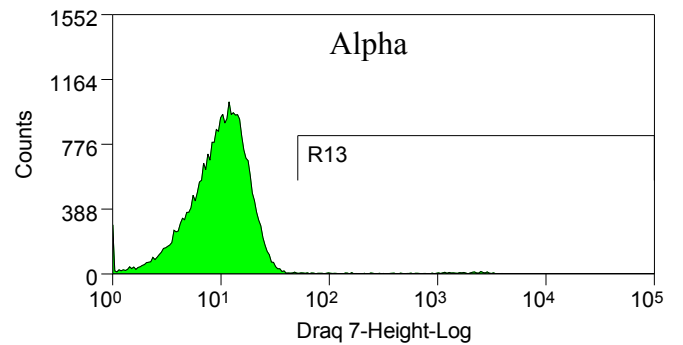

| Region | Count | % Hist | % All |
|--------|-------|--------|-------|
| Total  | 30000 | 100.00 | 6.00  |
| R13    | 417   | 1.39   | 0.08  |
