# Supplementary figures and images for: Pancreatic α- and β-cellular clocks have distinct molecular properties and impact on islet hormone secretion and gene expression
Source: PubMed Central journal article supplement — Genes Dev. 2017 Feb 15;31(4):383–98. doi: 10.1101/gad.290379.116 (PMC5358758; doi:10.1101/gad.290379.116), 2017-02-15

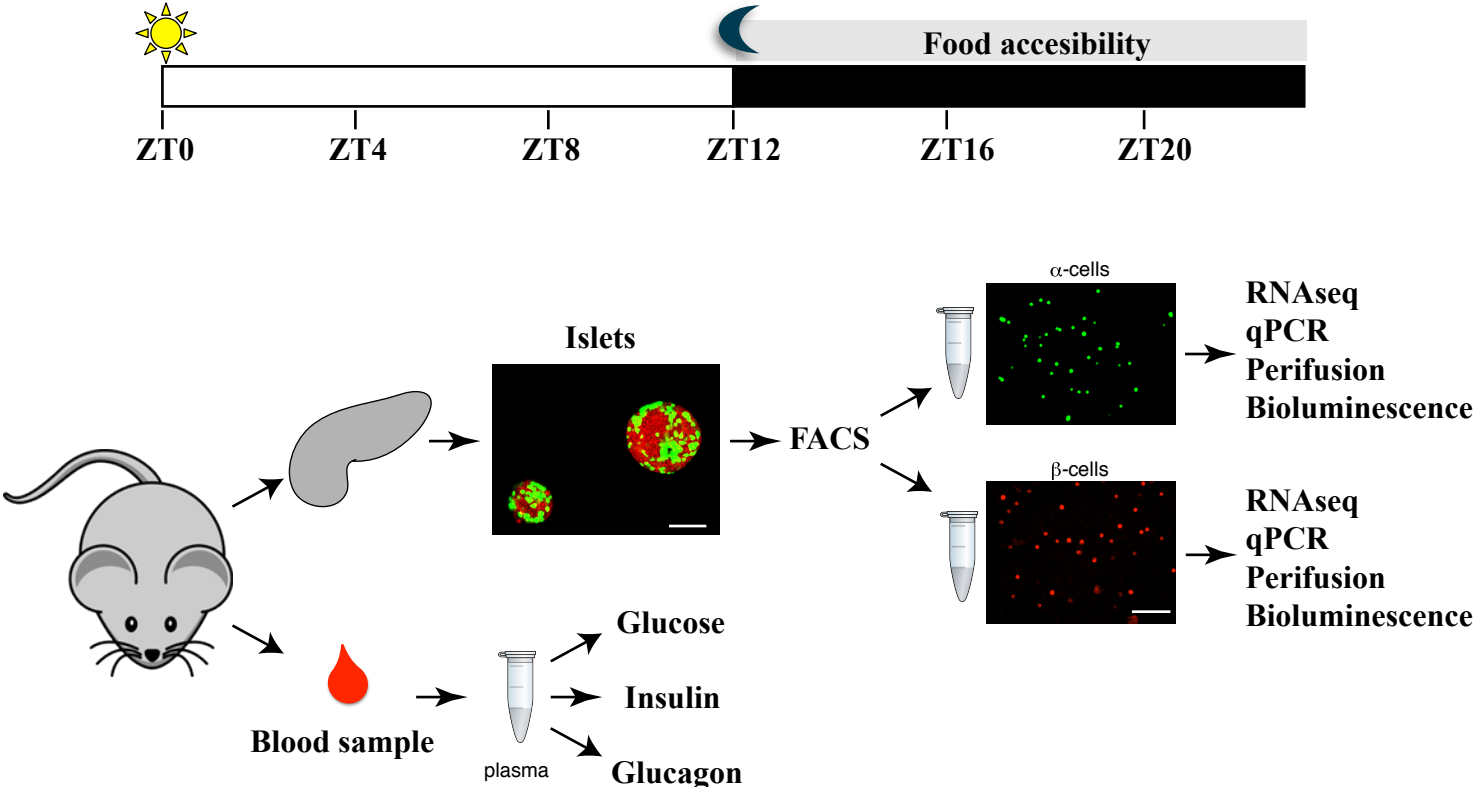

Supplement: supp_gad.290379.116_Supplemental_FigureS1.pdf [file supp_gad.290379.116_Supplemental_FigureS1.pdf]

**A**

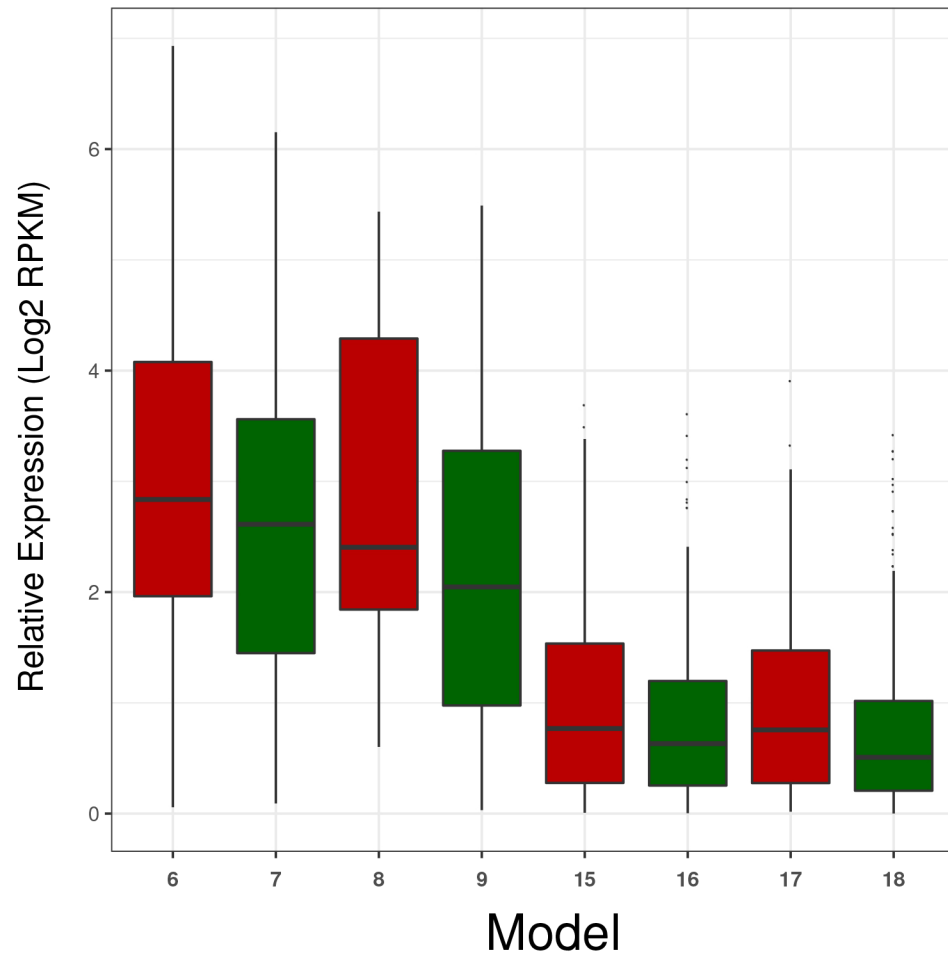

**B**

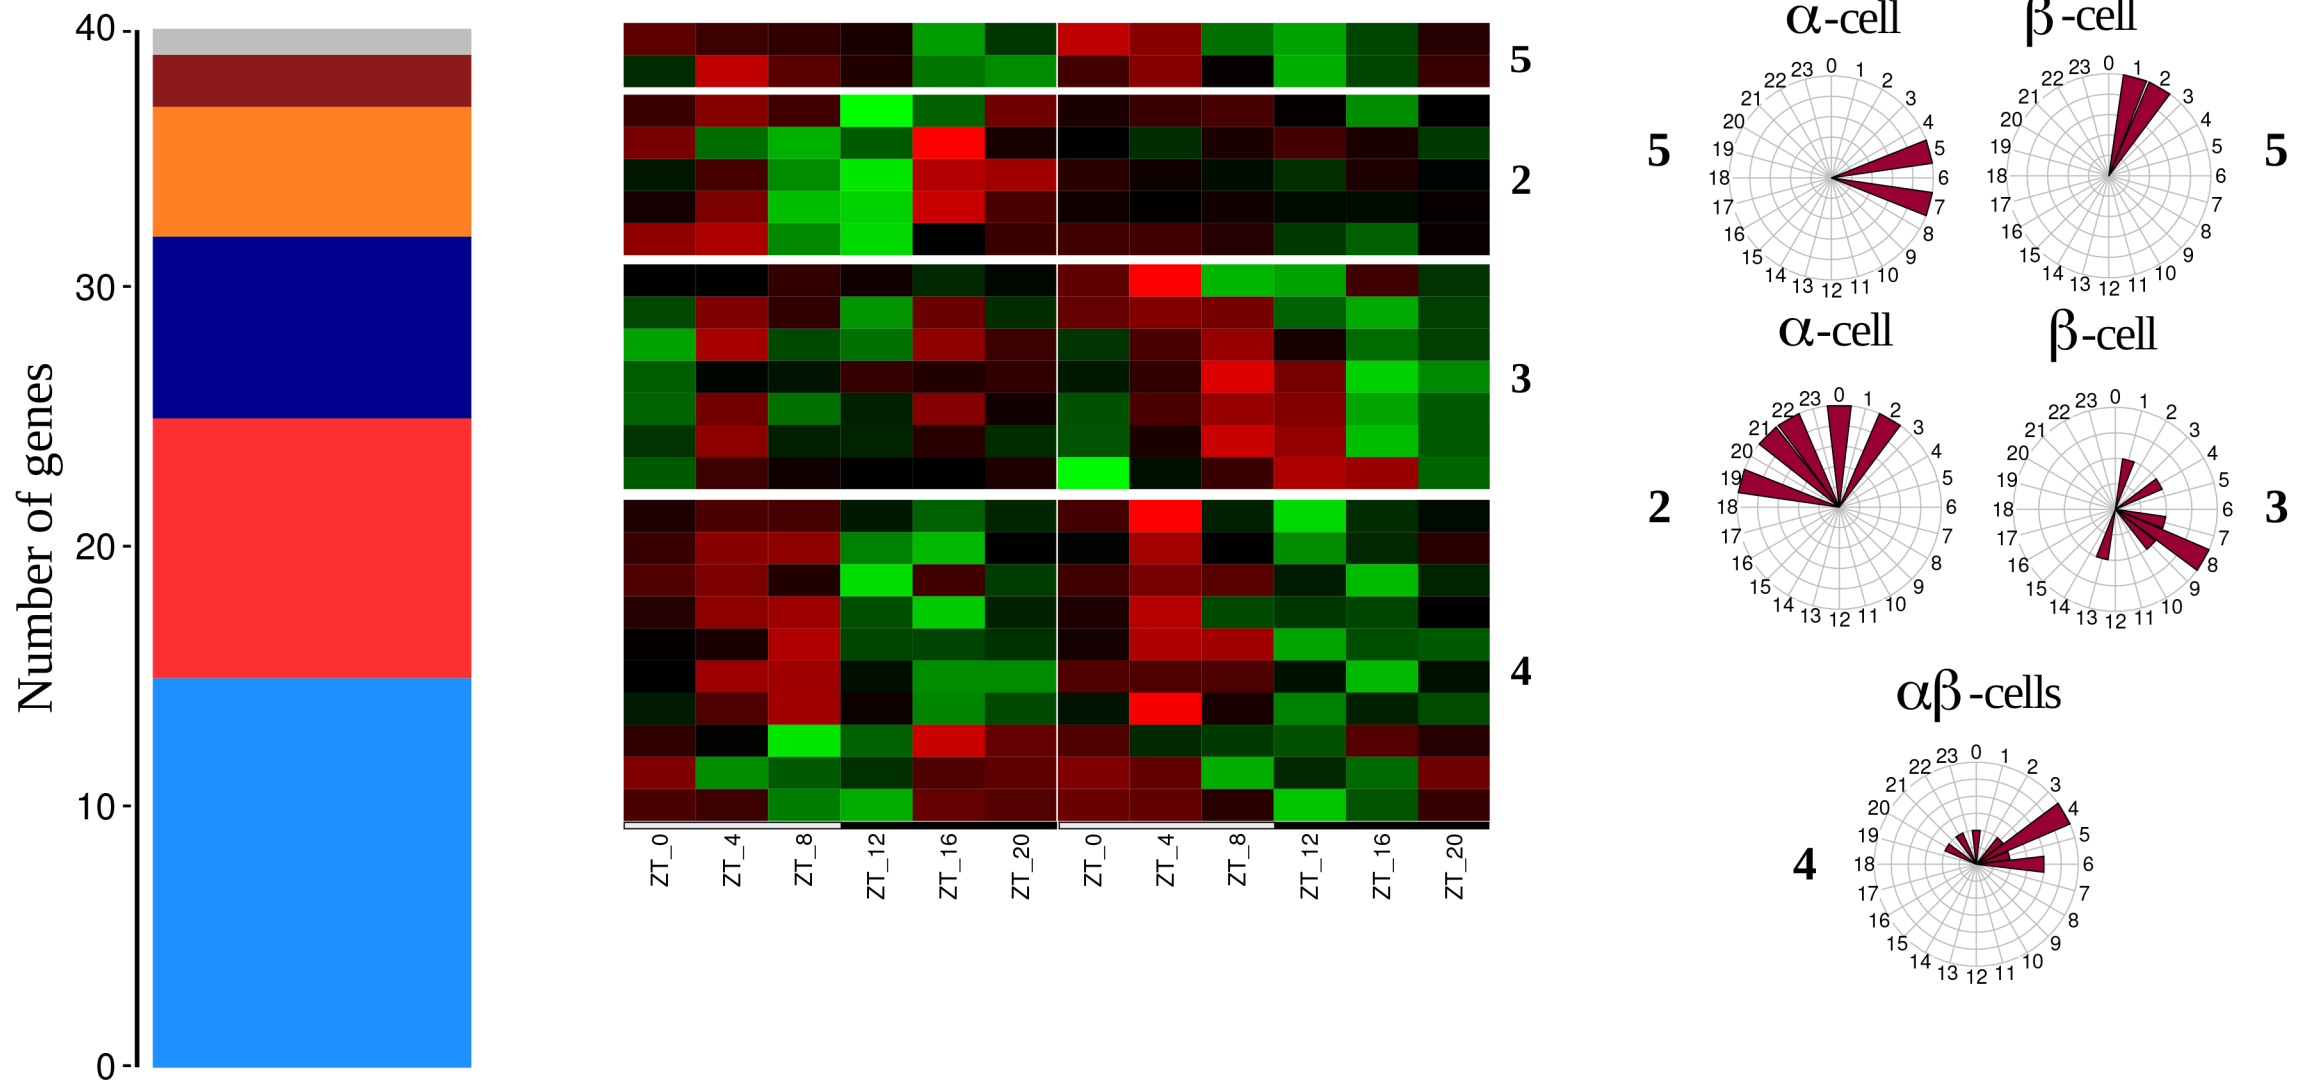

Supplement: supp_gad.290379.116_Supplemental_FigureS3.pdf [file supp_gad.290379.116_Supplemental_FigureS3.pdf]

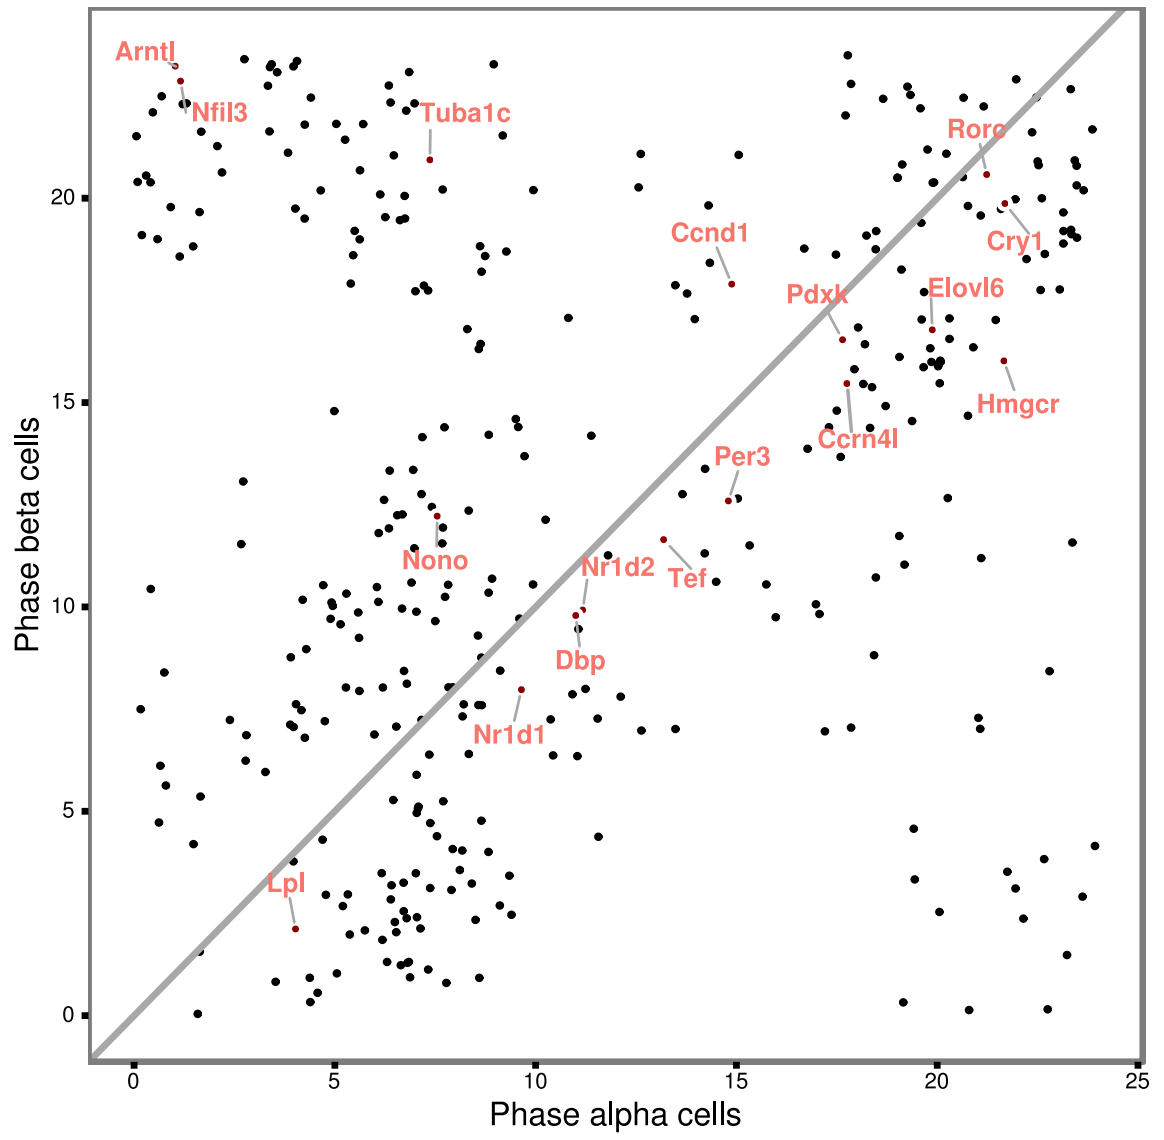

Supplement: supp_gad.290379.116_Supplemental_FigureS4.pdf [file supp_gad.290379.116_Supplemental_FigureS4.pdf]

**A**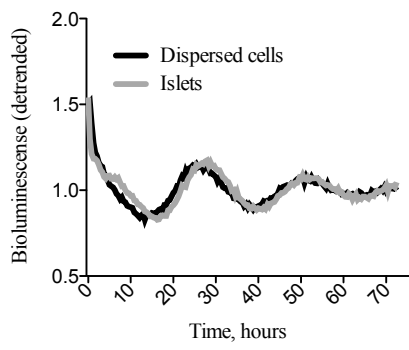**B**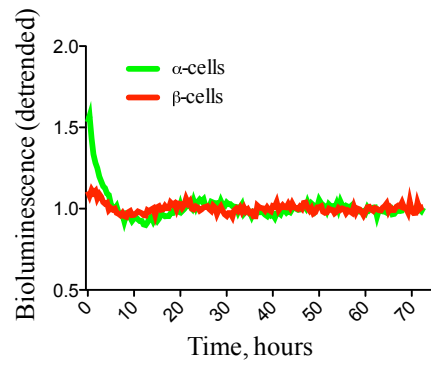**C**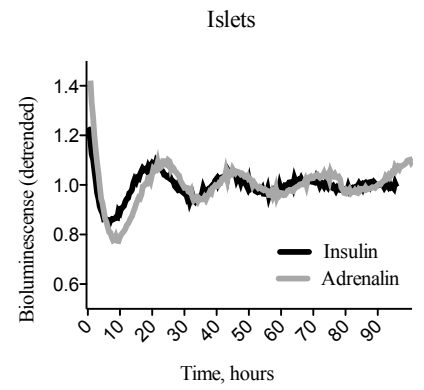

Supplement: supp_gad.290379.116_Supplemental_FigureS5.pdf [file supp_gad.290379.116_Supplemental_FigureS5.pdf]
